# Supplementary material for: A systematic review of dentists’ knowledge, perception, practice and confidence in managing patients with cancers
Source: PubMed Central journal article supplement — BMC Health Serv Res. 2024 Oct 23;24:1277. doi: 10.1186/s12913-024-11676-8 (PMC11515570; doi:10.1186/s12913-024-11676-8), 2024-10-23
Supplement: 12913_2024_11676_MOESM1_ESM.pdf [file 12913_2024_11676_MOESM1_ESM.pdf]

## Supplementary file 1: An example of database search strategy

### MEDLINE database search

|     |                                                    |
|-----|----------------------------------------------------|
| 1.  | Dentist*.mp.                                       |
| 2.  | exp dentist/                                       |
| 3.  | dental specialist*.mp.                             |
| 4.  | dental surgeon*.mp. or dental surgeon/             |
| 5.  | oral health professional*.mp.                      |
| 6.  | dental practi*.mp.                                 |
| 7.  | 1 or 2 or 3 or 4 or 5 or 6                         |
| 8.  | oral health*.mp.                                   |
| 9.  | dental care.mp.                                    |
| 10. | (dental care* or dental health* or oral care*).mp. |
| 11. | oral hygiene.mp. or exp mouth hygiene/             |
| 12. | oral hygiene*.mp.                                  |
| 13. | 8 or 9 or 10 or 11 or 12                           |
| 14. | exp neoplasm/                                      |
| 15. | (neoplasm* or cancer*).mp.                         |
| 16. | oncology*.mp. or exp oncology/                     |
| 17. | malignan*.mp or malignant neoplastic disease/      |
| 18. | 14 or 15 or 16 or 17                               |
| 19. | 7 and 13 and 18                                    |
| 20. | limit 19 to yr="1990-Current"                      |
