# Supplementary material for: A systematic review of dentists’ knowledge, perception, practice and confidence in managing patients with cancers
Source: PubMed Central journal article supplement — BMC Health Serv Res. 2024 Oct 23;24:1277. doi: 10.1186/s12913-024-11676-8 (PMC11515570; doi:10.1186/s12913-024-11676-8), 2024-10-23
Supplement: 12913_2024_11676_MOESM3_ESM.pdf [file 12913_2024_11676_MOESM3_ESM.pdf]

| ID | Authors, publication year | Perceptions (% positive response)                                                             |                                             |                                                                                                                                                                                                                                                                                                        |                                                                                                                                      |
|----|---------------------------|-----------------------------------------------------------------------------------------------|---------------------------------------------|--------------------------------------------------------------------------------------------------------------------------------------------------------------------------------------------------------------------------------------------------------------------------------------------------------|--------------------------------------------------------------------------------------------------------------------------------------|
|    |                           | Perceived adequacy of cancer knowledge                                                        | Perceived role in cancer patient management | Perceived role in OC prevention & OCE                                                                                                                                                                                                                                                                  | Perceived adequacy of training/ further training                                                                                     |
| 1  | Ahmed & Naidoo (2019)     | OC knowledge is current (26.7%).<br><br>Oral cancer prevention knowledge is sufficient (65%). | NR                                          | NR                                                                                                                                                                                                                                                                                                     | Sufficient training in OC diagnosis (33.6%).<br><br>Interested in further CE regarding prevention and early detection of OC (95.6%). |
| 2  | Akbari et al (2015)       | NR                                                                                            | NR                                          | NR                                                                                                                                                                                                                                                                                                     | NR                                                                                                                                   |
| 3  | Alhazzazi (2021)          | NR                                                                                            | NR                                          | Performed OCE for HNC patients (78%).<br>Performed OCE HNC high risk patients (17%).                                                                                                                                                                                                                   | NR                                                                                                                                   |
| 4  | Alonge & Narendran (2004) | NR                                                                                            | NR                                          | NR                                                                                                                                                                                                                                                                                                     | Adequate undergraduate OCE training (75%).<br><br>Interested in oral cancer CE (81%).                                                |
| 5  | Alqahtani et al (2021)    | NR                                                                                            | NR                                          | NR                                                                                                                                                                                                                                                                                                     | NR                                                                                                                                   |
| 6  | Alqutaibi et al (2021)    | NR                                                                                            | NR                                          | Prosthodontists believed OCE should occur at: initial exam (96.5%), recall (84.6%); targeted at high risk group (85.3%).<br><br>Prosthodontists role to perform OCE (72%).<br><br>Prosthodontists with <10 years experience showed significantly better attitude in regards to OC screening (p=0.011). | Prosthodontists believed they were adequately trained to detect oral cancer (58%).                                                   |
| 7  | Borhan-Mojabi (2012)      | OC knowledge is sufficient (59.3%).                                                           | NR                                          | NR                                                                                                                                                                                                                                                                                                     | NR                                                                                                                                   |
| 8  | Calvert et al (2014)      | NR                                                                                            | NR                                          | NR                                                                                                                                                                                                                                                                                                     | NR                                                                                                                                   |
| 9  | Canto et al (2001)        | OC knowledge is current (78%).                                                                | NR                                          | NR                                                                                                                                                                                                                                                                                                     | Interested in OC CE (81%).                                                                                                           |

|    |                      |                                                                                                                                                  |                                                                                                   |                                                                                                                                                                                                                                                                                               |                                                                                                                                                                                                                                                                                                                                                                                                                                                   |
|----|----------------------|--------------------------------------------------------------------------------------------------------------------------------------------------|---------------------------------------------------------------------------------------------------|-----------------------------------------------------------------------------------------------------------------------------------------------------------------------------------------------------------------------------------------------------------------------------------------------|---------------------------------------------------------------------------------------------------------------------------------------------------------------------------------------------------------------------------------------------------------------------------------------------------------------------------------------------------------------------------------------------------------------------------------------------------|
| 10 | Clovis et al (2002)  | OC knowledge is current (56.7%).                                                                                                                 | NR                                                                                                | NR                                                                                                                                                                                                                                                                                            | Interested in further OC CE (77%).                                                                                                                                                                                                                                                                                                                                                                                                                |
| 11 | Colella et al (2008) | NR                                                                                                                                               | NR                                                                                                | NR                                                                                                                                                                                                                                                                                            | <p>Adequately prepared to advise patients with suspicious oral lesions (63.1%).</p> <p>Adequately trained to inform OC risk factors (41.6%).</p> <p>Adequately trained to provide tobacco cessation (80.9%).</p> <p>Adequately trained for alcohol cessation (76.5%).</p> <p>Adequately trained to perform OC exam (53.6%).</p> <p>Adequately trained to perform LN exam (66.8%).</p> <p>Interested in receiving further OC training (96.1%).</p> |
| 12 | Cruz et al (2005)    | NR                                                                                                                                               | NR                                                                                                | NR                                                                                                                                                                                                                                                                                            | NR                                                                                                                                                                                                                                                                                                                                                                                                                                                |
| 13 | Daley et al (2011)   | NR                                                                                                                                               | NR                                                                                                | <p>OHP responses varied regarding whether or not their role should be to discuss the HPV-OC link and/or HPV vaccines with patients.</p> <p>Concerns about the appropriateness of HPV-OC discussions with patients due to confidentiality and gender roles results in some OHP discomfort.</p> | A desire for additional guidance from their professional organisations on ways to manage screening for HPV-related OC.                                                                                                                                                                                                                                                                                                                            |
| 14 | Dang et al (2022)    | NR                                                                                                                                               | NR                                                                                                | NR                                                                                                                                                                                                                                                                                            | Adequately trained to treat oncology patients (50%).                                                                                                                                                                                                                                                                                                                                                                                              |
| 15 | Dewan et al (2014)   | NR                                                                                                                                               | NR                                                                                                | NR                                                                                                                                                                                                                                                                                            | NR                                                                                                                                                                                                                                                                                                                                                                                                                                                |
| 16 | Dixon et al (2021)   | New Zealand graduates and trained dentists who saw greater numbers of HNC patients in the prior year were more likely to trust their own advice. | Dental treatment for HNC patients falls within the scope of practice for a general dentist (75%). | NR                                                                                                                                                                                                                                                                                            | <p>Adequately trained to treat HNC patients (25%).</p> <p>Public sector experience was associated with having undertaken HNC professional development in the previous 5 years.</p>                                                                                                                                                                                                                                                                |

|    |                       |                                                         |                                                                                                                                                                                                                                                                                                                                                      |                                                                                                                                                                         |                                                                                                                                                                       |
|----|-----------------------|---------------------------------------------------------|------------------------------------------------------------------------------------------------------------------------------------------------------------------------------------------------------------------------------------------------------------------------------------------------------------------------------------------------------|-------------------------------------------------------------------------------------------------------------------------------------------------------------------------|-----------------------------------------------------------------------------------------------------------------------------------------------------------------------|
| 17 | Ekici (2020)          | Sufficient OC detection & prevention knowledge (29.3%). | NR                                                                                                                                                                                                                                                                                                                                                   | NR                                                                                                                                                                      | Adequate undergraduate training on oral malignant and premalignant lesions (38.1%).<br><br>Interested in further OC training (77.9%).                                 |
| 18 | Fidele et al (2022)   | OC knowledge is current (35.8%).                        | NR                                                                                                                                                                                                                                                                                                                                                   | NR                                                                                                                                                                      | Adequately trained to perform OCE (35.8%).<br><br>A need for additional training in the early detection of OC (85%).                                                  |
| 19 | Frydrych et al (2012) | Knowledge in managing OC patients is current (37.1%).   | Refer OC patients for a pre-radiation therapy dental assessment (32.9%).<br><br>Refer patients to a specialist for management of post completion OC treatment (25.7%).<br><br>GDPs should be able to provide dental treatment for OC patients (77.7%).<br><br>Dental adverse effects can be prevented in OC patients with radiation therapy (73.7%). | NR                                                                                                                                                                      | Adequately trained to manage cancer patients (42.3%).<br><br>Interested in further CE on the management of OC patients (92.9%).                                       |
| 20 | Gajendra et al (2006) | OC knowledge is current (72%).                          | NR                                                                                                                                                                                                                                                                                                                                                   | NR                                                                                                                                                                      | 75% dentists reported taking OC CE course in the last 5 years. As a result of taking course, 34% dentists reported making changes in their practice of OC prevention. |
| 21 | Gureri et al (2008)   | NR                                                      | NR                                                                                                                                                                                                                                                                                                                                                   | NR                                                                                                                                                                      | NR                                                                                                                                                                    |
| 22 | Haresaku et al (2018) | NR                                                      | NR                                                                                                                                                                                                                                                                                                                                                   | A significantly more J than A felt dentists should routinely perform OCE (J: 76.8%, A: NR) (p<0.001).<br><br><i>NB: J = Japanese dentists, A = Australian dentists.</i> | Japanese-dentists felt they needed additional training in OCE compared to Australian-dentists (p<0.001).                                                              |
| 23 | Hashim et al (2018)   | NR                                                      | NR                                                                                                                                                                                                                                                                                                                                                   | NR                                                                                                                                                                      | Need further training on OC detection (84.9%)                                                                                                                         |

|    |                       |                                             |                                                                                                                                                                                                                                                                                                                                                                                                                                                                                                                                         |                                                                                        |                                                                                                                                                                                                                                                                                       |
|----|-----------------------|---------------------------------------------|-----------------------------------------------------------------------------------------------------------------------------------------------------------------------------------------------------------------------------------------------------------------------------------------------------------------------------------------------------------------------------------------------------------------------------------------------------------------------------------------------------------------------------------------|----------------------------------------------------------------------------------------|---------------------------------------------------------------------------------------------------------------------------------------------------------------------------------------------------------------------------------------------------------------------------------------|
| 24 | Horowitz et al (2000) | NR                                          | NR                                                                                                                                                                                                                                                                                                                                                                                                                                                                                                                                      | Tobacco cessation education on patients (71%).<br>Alcohol cessation counselling (50%). | OC dental education was good/very good (78%).<br>Adequately trained to examine OC patients (88%).<br>Adequately trained to palpate LNs (72%).<br>Adequately trained to provide tobacco cessation education (28%).<br>Adequately trained to provide alcohol cessation education (11%). |
| 25 | Husein et al (2011)   | NR                                          | GDPs were comfortable managing H & N cancer patients (47%).<br><br>>50% GDPs perception in managing: caries (88%), xerostomia (56%), detecting recurrence (77%), smoking-cessation advice (80%),<br><br>trismus (28%) & mucositis (38%).<br><br>Perceived role in OC management (thematic analysis): prevention of caries, dietary advice, guidance & moral support.<br><br>OC patients should be treated at: joint care (85%), dental hospital (71%), maxillofacial unit (69%), salaried dental service (55%), general practice (67%). | NR                                                                                     | Interested in postgraduate training in managing H & N cancer patients (92%)                                                                                                                                                                                                           |
| 26 | Joseph et al (2012)   | OC knowledge is current (52%).              | NR                                                                                                                                                                                                                                                                                                                                                                                                                                                                                                                                      | NR                                                                                     | Adequately trained for OCE (58%)                                                                                                                                                                                                                                                      |
| 27 | Kogi et al (2019)     | OC knowledge & skills are sufficient (11%). | NR                                                                                                                                                                                                                                                                                                                                                                                                                                                                                                                                      | NR                                                                                     | NR                                                                                                                                                                                                                                                                                    |

|    |                           |                                                                                                                                                                                                                                                                           |                                                                             |                                                                                                                    |                                                                                                                                                                                                                            |
|----|---------------------------|---------------------------------------------------------------------------------------------------------------------------------------------------------------------------------------------------------------------------------------------------------------------------|-----------------------------------------------------------------------------|--------------------------------------------------------------------------------------------------------------------|----------------------------------------------------------------------------------------------------------------------------------------------------------------------------------------------------------------------------|
| 28 | Kujan et al (2006)        | NR                                                                                                                                                                                                                                                                        | NR                                                                          | National-based OCE program would decrease morbidity and mortality (47.6%) [GDPs: 52.4%, dental specialists: 35.4%] | Adequately trained for OCE (51%)                                                                                                                                                                                           |
| 29 | Leão et al (2005)         | There was no correlation between actual and perceived knowledge of oral cancer. A higher percentage of wrong answers (actual knowledge) were found among those who considered themselves with higher knowledge (perceived knowledge) on the 5-point ordinal Likert scale. | NR                                                                          | NR                                                                                                                 | NR                                                                                                                                                                                                                         |
| 30 | LeHew et al (2010)        | NR                                                                                                                                                                                                                                                                        | NR                                                                          | Dentists should be trained for OCE (99%).                                                                          | NR                                                                                                                                                                                                                         |
| 31 | Lopez-Jornet et al (2010) | OC knowledge is current (49.7%).<br><br>Dentists who rated their undergraduate OC training favourably were more likely to agree that their OC knowledge was current.                                                                                                      | NR                                                                          | OCE for patients >40 years (89.7%).<br><br>Dentists are qualified to perform OCE (94.7%).                          | Adequately trained to provide tobacco cessation education (41.5%).<br><br>Adequately trained to provide alcohol cessation education (27.6%).<br><br>Adequately trained to palpate cervical LNs in cancer patients (52.6%). |
| 32 | Marino et al (2017)       | NR                                                                                                                                                                                                                                                                        | NR                                                                          | NR                                                                                                                 | NR                                                                                                                                                                                                                         |
| 33 | Martins et al (2021)      | NR                                                                                                                                                                                                                                                                        | HNC RT patients to be evaluated by a dentists trained in the field (77.14%) | NR                                                                                                                 | NR                                                                                                                                                                                                                         |
| 34 | Maybury et al (2012)      | OC knowledge is current (74%).                                                                                                                                                                                                                                            | NR                                                                          | NR                                                                                                                 | Majority agreed they were adequately trained to provide tobacco and alcohol cessation counselling.<br><br>Adequate OC education (83%).                                                                                     |
| 35 | McCann et al (2000)       | NR                                                                                                                                                                                                                                                                        | NR                                                                          | Role to prevent OC (90%).                                                                                          | NR                                                                                                                                                                                                                         |

|    |                              |                                                                                                                                                                                                                                     |    |    |                                                                                                                                                                                                                                           |
|----|------------------------------|-------------------------------------------------------------------------------------------------------------------------------------------------------------------------------------------------------------------------------------|----|----|-------------------------------------------------------------------------------------------------------------------------------------------------------------------------------------------------------------------------------------------|
| 36 | Nazar et al (2022)           | OC knowledge is current (53.9%).<br><br>Dentists with a master degree had higher mean opinion score (felt they were better trained for OCE, their knowledge was current) compared to those with only a bachelor degree (p = 0.006). | NR | NR | Adequate training to perform OCE (37.4%).<br><br>Interested in OC CE (95.8%).                                                                                                                                                             |
| 37 | Nazar et al (2019)           | OC knowledge is current (55%).                                                                                                                                                                                                      | NR | NR | Adequate training to perform OCE (38%).<br><br>Interested in attending OC CE (92.4%).                                                                                                                                                     |
| 38 | Nicholls & Ilankovan (1998)  | NR                                                                                                                                                                                                                                  | NR | NR | NR                                                                                                                                                                                                                                        |
| 39 | Patel et al (2012)           | NR                                                                                                                                                                                                                                  | NR | NR | Adequate undergraduate training in taking care of HNRT patients (45%).<br><br>No correlation between years of graduation and adequacy of training.                                                                                        |
| 40 | Patton et al (2006)          | OC knowledge is current (70.5%).                                                                                                                                                                                                    | NR | NR | Adequately trained for OCE (89.4%).<br><br>Adequately trained to palpate LNs (77.4%).<br><br>Adequately trained to provide tobacco cessation education (30.5%).<br><br>Adequately trained to provide alcohol cessation education (13.5%). |
| 41 | Pavão Spaulonci et al (2018) | OCE knowledge is sufficient (52.9).<br><br>Dentists with self-reported satisfactory OC knowledge were more likely to have satisfactory OC knowledge.                                                                                | NR | NR | 70.2% junior dentists vs 43.8% senior dentists reported adequate OCE during undergraduate degree (average 55.6%).                                                                                                                         |
| 42 | Reed et al (2000)            | NR                                                                                                                                                                                                                                  | NR | NR | Interested in receiving OCE training (40%).                                                                                                                                                                                               |

|    |                        |                                                                                                                                                                          |    |                                                                                                                                                                                                                                                                                          |                                                                                                                                                                                                                         |
|----|------------------------|--------------------------------------------------------------------------------------------------------------------------------------------------------------------------|----|------------------------------------------------------------------------------------------------------------------------------------------------------------------------------------------------------------------------------------------------------------------------------------------|-------------------------------------------------------------------------------------------------------------------------------------------------------------------------------------------------------------------------|
|    |                        |                                                                                                                                                                          |    |                                                                                                                                                                                                                                                                                          | <u>Preferred training format:</u> annual state association meeting (25%), local professional meeting (21%), local office visit (8%), computer module (17%), continuing medical education credit (15%), conference (6%). |
| 43 | Saleh et al (2014)     | OC detection knowledge is sufficient (35.6%).<br><br>OC risks knowledge is sufficient (45.7%).<br><br>Perception of OC knowledge is consistent with actual OC knowledge. | NR | OCE can prevent & early detection of OC (90.6%).                                                                                                                                                                                                                                         | Interested in further CE regardless of their practice of OCE or confidence levels (70%).                                                                                                                                |
| 44 | Seals (1990)           | NR                                                                                                                                                                       | NR | NR                                                                                                                                                                                                                                                                                       | Adequately prepared to detect and diagnose oral lesions (86.5%).<br><br>Adequately trained to manage and provide dental care for cancer patients (72.9%).<br><br>Interest in OC CE (95.5%).                             |
| 45 | Seoane et al (2006)    | NR                                                                                                                                                                       | NR | NR                                                                                                                                                                                                                                                                                       | NR                                                                                                                                                                                                                      |
| 46 | Shadid & Habash (2023) | NR                                                                                                                                                                       | NR | Dentists with >15 years' experience had more positive opinions towards OCE than those of less experience (p<0.05).<br>Role of dentists to screen for oral pathology (94.9%).<br>OCE should be performed all new patients (82.7%)<br>OCE should be performed for recall patients (74.4%). | Adequately trained in OCE (44.9%).                                                                                                                                                                                      |
| 47 | Strey et al (2022)     | NR                                                                                                                                                                       | NR | Dentists refer biopsies to other specialists (90%).                                                                                                                                                                                                                                      | Sufficient OC training (55.21%)<br><br>Dentists with more years of experience after graduation than recent graduates found undergraduate OC theoretical & practical training to be insufficient (p<0.05).               |

|    |                              |                                                                                                                                                                             |                                                                                                        |                                                                                                |                                          |
|----|------------------------------|-----------------------------------------------------------------------------------------------------------------------------------------------------------------------------|--------------------------------------------------------------------------------------------------------|------------------------------------------------------------------------------------------------|------------------------------------------|
| 48 | Taheri et al (2018)          | NR                                                                                                                                                                          | NR                                                                                                     | NR                                                                                             | NR                                       |
| 49 | Tami-Maury et al (2016)      | NR                                                                                                                                                                          | GDPs provide dental treatment to patients undergoing cancer therapy or with a history of cancer (91%). | NR                                                                                             | NR                                       |
| 50 | Vijay Kumar & Suresan (2012) | OC knowledge is current (43%).                                                                                                                                              | NR                                                                                                     | Annual OCE for patients >40 years (68%).<br>Referral to specialists if OC was suspected (98%). | Adequately trained to perform OCE (68%). |
| 51 | Wong & Toljanic (2009)       | NR                                                                                                                                                                          | NR                                                                                                     | NR                                                                                             | NR                                       |
| 52 | Wright et al (2011)          | NR                                                                                                                                                                          | NR                                                                                                     | NR                                                                                             | NR                                       |
| 53 | Yellowitz et al (1998)       | OC knowledge is current (73%).<br><br>Most dentists perceived their knowledge to be current and accurate however this was not reflected in their actual OC knowledge score. | NR                                                                                                     | Annual OCE for patients >40 years (98%).                                                       | Adequately trained to perform OCE (88%). |

Note: CE = Continuing education; ENT = Ear nose and throat specialists; GDPs = General dental practitioners; HCPs = Health care professionals; HNC = Head and neck cancer; H & N = Head and neck; HPV = Human Papilloma Virus; HSV = Herpes Simplex Virus; LNs = Lymph nodes; NR = Not reported; OC = Oral cancer; OCE = Oral cancer examination; OH = Oral hygiene; OHPs = Oral health professionals; RT = Radiation therapy; SCC = Squamous Cell Carcinoma.
