# Supplementary material for: A systematic review of dentists’ knowledge, perception, practice and confidence in managing patients with cancers
Source: PubMed Central journal article supplement — BMC Health Serv Res. 2024 Oct 23;24:1277. doi: 10.1186/s12913-024-11676-8 (PMC11515570; doi:10.1186/s12913-024-11676-8), 2024-10-23
Supplement: 12913_2024_11676_MOESM5_ESM.pdf [file 12913_2024_11676_MOESM5_ESM.pdf]

**Supplementary file 2: Mixed Methods Tools**

**Quantitative studies**

| <b>ID</b> | <b>Authors, publican year</b> | <b>Are there clear research questions?</b> | <b>Do the collected data allow to address the research questions?</b> | <b>Is the sampling strategy relevant to address the research question?</b> | <b>Is the sample representative of the target population?</b> | <b>Are the measurements appropriate?</b> | <b>Is the risk of non-response bias low?</b> | <b>Is the statistical analysis appropriate to answer the research question?</b> | <b>% score</b> |
|-----------|-------------------------------|--------------------------------------------|-----------------------------------------------------------------------|----------------------------------------------------------------------------|---------------------------------------------------------------|------------------------------------------|----------------------------------------------|---------------------------------------------------------------------------------|----------------|
| 1         | Ahmed & Naidoo (2019)         | Yes                                        | Yes                                                                   | Yes                                                                        | Yes                                                           | Can't tell                               | No                                           | Yes                                                                             | 71.43          |
| 2         | Akbari et al (2015)           | Yes                                        | Yes                                                                   | Yes                                                                        | No                                                            | Yes                                      | No                                           | Yes                                                                             | 71.43          |
| 3         | Alhazzazi (2021)              | Yes                                        | Yes                                                                   | Yes                                                                        | Yes                                                           | Yes                                      | No                                           | Yes                                                                             | 85.71          |
| 4         | Alonge & Narendran (2004)     | Yes                                        | Yes                                                                   | Yes                                                                        | Yes                                                           | Yes                                      | No                                           | Yes                                                                             | 85.71          |
| 5         | Alqahtani et al (2021)        | Yes                                        | Yes                                                                   | Yes                                                                        | Yes                                                           | Yes                                      | Can't tell                                   | Yes                                                                             | 85.71          |
| 6         | Alqutaibi et al (2021)        | Yes                                        | Yes                                                                   | Yes                                                                        | Yes                                                           | Yes                                      | No                                           | Yes                                                                             | 85.71          |
| 7         | Borhan-Mojabi (2012)          | Yes                                        | Yes                                                                   | Yes                                                                        | Can't tell                                                    | Can't tell                               | No                                           | Yes                                                                             | 57.14          |
| 8         | Calvert et al (2014)          | Yes                                        | Yes                                                                   | Yes                                                                        | Yes                                                           | Yes                                      | No                                           | Yes                                                                             | 85.71          |
| 9         | Canto et al (2001)            | Yes                                        | Yes                                                                   | Yes                                                                        | Can't tell                                                    | Yes                                      | No                                           | Yes                                                                             | 71.43          |
| 10        | Clovis et al (2002)           | Yes                                        | Yes                                                                   | Yes                                                                        | Can't tell                                                    | Yes                                      | No                                           | Yes                                                                             | 71.43          |
| 11        | Colella et al (2008)          | Yes                                        | Yes                                                                   | Yes                                                                        | Can't tell                                                    | Yes                                      | No                                           | Yes                                                                             | 71.43          |
| 12        | Cruz et al (2005)             | Yes                                        | Yes                                                                   | Yes                                                                        | Yes                                                           | Yes                                      | No                                           | Yes                                                                             | 85.71          |
| 14        | Dang et al (2022)             | Yes                                        | Yes                                                                   | Yes                                                                        | Can't tell                                                    | Yes                                      | No                                           | Yes                                                                             | 71.43          |
| 15        | Dewan et al (2014)            | Yes                                        | Yes                                                                   | Yes                                                                        | Yes                                                           | Yes                                      | No                                           | Yes                                                                             | 85.71          |
| 16        | Ekici (2020)                  | Yes                                        | Yes                                                                   | Yes                                                                        | Yes                                                           | Yes                                      | No                                           | Yes                                                                             | 71.43          |
| 17        | Fidele et al (2022)           | Yes                                        | Yes                                                                   | Yes                                                                        | Yes                                                           | Yes                                      | Can't tell                                   | Yes                                                                             | 85.71          |
| 18        | Frydrych et al (2012)         | Yes                                        | Yes                                                                   | Yes                                                                        | Yes                                                           | Can't tell                               | No                                           | Yes                                                                             | 71.43          |
| 19        | Gajendra et al (2006)         | Yes                                        | Yes                                                                   | yes                                                                        | Yes                                                           | Yes                                      | No                                           | Yes                                                                             | 85.71          |
| 20        | Guneri et al (2008)           | Yes                                        | Yes                                                                   | Yes                                                                        | Yes                                                           | Yes                                      | No                                           | Can't tell                                                                      | 71.43          |
| 21        | Haresaku et al (2018)         | Yes                                        | Can't tell                                                            | yes                                                                        | Can't tell                                                    | Can't tell                               | No                                           | Yes                                                                             | 42.86          |
| 22        | Hashim et al (2018)           | Yes                                        | Yes                                                                   | Yes                                                                        | Yes                                                           | Yes                                      | No                                           | Yes                                                                             | 85.71          |
| 24        | Horowitz et al (2000)         | Yes                                        | Yes                                                                   | Yes                                                                        | Yes                                                           | Can't tell                               | No                                           | Yes                                                                             | 71.43          |
| 25        | Husein et al (2011)           | Yes                                        | Yes                                                                   | Yes                                                                        | Yes                                                           | Yes                                      | No                                           | Can't tell                                                                      | 71.43          |
| 26        | Joseph et al (2012)           | Yes                                        | Yes                                                                   | Yes                                                                        | Can't tell                                                    | Yes                                      | No                                           | Yes                                                                             | 71.43          |
| 27        | Kogi et al (2019)             | Yes                                        | Yes                                                                   | No                                                                         | Can't tell                                                    | Yes                                      | No                                           | Yes                                                                             | 57.14          |
| 28        | Kujan et al (2006)            | Yes                                        | Yes                                                                   | Yes                                                                        | Yes                                                           | Yes                                      | No                                           | Yes                                                                             | 85.71          |

|    |                              |            |            |     |            |            |            |            |       |
|----|------------------------------|------------|------------|-----|------------|------------|------------|------------|-------|
| 29 | Leão et al (2005)            | Yes        | Yes        | Yes | Can't tell | Can't tell | No         | Yes        | 57.14 |
| 30 | LeHew et al (2010)           | Yes        | Yes        | No  | Can't tell | Can't tell | No         | Yes        | 42.86 |
| 31 | Lopez-Jornet et al (2010)    | Yes        | Yes        | Yes | Can't tell | Yes        | No         | Yes        | 71.43 |
| 32 | Marino et al (2017)          | Yes        | Yes        | Yes | Yes        | Can't tell | No         | Yes        | 85.71 |
| 33 | Martins et al (2021)         | Yes        | Yes        | Yes | Can't tell | Can't tell | Can't tell | Yes        | 57.14 |
| 34 | Maybury et al (2012)         | Yes        | Yes        | Yes | Yes        | Yes        | No         | Yes        | 85.71 |
| 35 | McCann et al (2000)          | Yes        | Yes        | Yes | Yes        | Yes        | No         | Yes        | 85.71 |
| 36 | Nazar et al (2022)           | Yes        | Yes        | Yes | Yes        | Yes        | No         | Yes        | 85.71 |
| 37 | Nazar et al (2019)           | Yes        | Yes        | Yes | Yes        | Yes        | No         | Yes        | 85.71 |
| 38 | Nicholls & Ilankovan (1998)  | Can't tell | Can't tell | No  | Can't tell | Can't tell | No         | Can't tell | 0.00  |
| 39 | Patel et al (2012)           | Yes        | Yes        | Yes | Yes        | Yes        | No         | Yes        | 85.71 |
| 40 | Patton et al (2006)          | Yes        | Yes        | Yes | Can't tell | Yes        | No         | Yes        | 71.43 |
| 41 | Pavão Spaulonci et al (2018) | Yes        | Yes        | Yes | Can't tell | Yes        | No         | Yes        | 71.43 |
| 42 | Reed et al (2000)            | Yes        | Yes        | Yes | Yes        | Can't tell | No         | Yes        | 85.71 |
| 43 | Saleh et al (2014)           | Yes        | Yes        | Yes | No         | Yes        | No         | Yes        | 71.43 |
| 44 | Seals (1990)                 | Yes        | Yes        | Yes | Yes        | Yes        | No         | Can't tell | 71.43 |
| 45 | Seoane et al (2006)          | Yes        | Yes        | Yes | Can't tell | Yes        | No         | Yes        | 71.43 |
| 46 | Shadid & Habash (2022)       | Yes        | Yes        | Yes | Yes        | Yes        | No         | Yes        | 85.71 |
| 47 | Strey et al (2022)           | Yes        | Yes        | Yes | Can't tell | Can't tell | No         | Yes        | 71.43 |
| 48 | Taheri et al (2018)          | Yes        | Yes        | Yes | Can't tell | Yes        | No         | Yes        | 71.43 |
| 49 | Tami-Maury et al (2016)      | Yes        | Yes        | Yes | Yes        | Can't tell | No         | Yes        | 57.14 |
| 50 | Vijay Kumar & Suresan (2012) | Yes        | Yes        | Yes | Can't tell | Yes        | No         | Yes        | 71.43 |
| 51 | Wong & Toljanic (2009)       | Yes        | Yes        | Yes | No         | Yes        | No         | Yes        | 71.43 |
| 52 | Wright et al (2011)          | Yes        | Yes        | Yes | Can't tell | Can't tell | No         | Yes        | 71.43 |
| 53 | Yellowitz et al (1998)       | Yes        | Yes        | Yes | Yes        | Yes        | No         | Can't tell | 57.14 |

### Qualitative studies

| ID | Authors, publican year | Are there clear research questions? | Do the collected data allow to address the research questions? | Is the qualitative approach appropriate to answer the | Are the qualitative data collection methods adequate to address the | Are the findings adequately derived from the data? | Is the interpretation of results sufficiently substantiated by data? | Is there coherence between qualitative data sources, collection, | % score |
|----|------------------------|-------------------------------------|----------------------------------------------------------------|-------------------------------------------------------|---------------------------------------------------------------------|----------------------------------------------------|----------------------------------------------------------------------|------------------------------------------------------------------|---------|
|----|------------------------|-------------------------------------|----------------------------------------------------------------|-------------------------------------------------------|---------------------------------------------------------------------|----------------------------------------------------|----------------------------------------------------------------------|------------------------------------------------------------------|---------|

|    |                    |     |     |                           |                           |     |     |                                     |        |
|----|--------------------|-----|-----|---------------------------|---------------------------|-----|-----|-------------------------------------|--------|
|    |                    |     |     | <b>research question?</b> | <b>research question?</b> |     |     | <b>analysis and interpretation?</b> |        |
| 13 | Daley et al (2011) | Yes | Yes | Yes                       | Yes                       | Yes | Yes | Yes                                 | 100.00 |

#### Mixed method studies

| <b>ID</b> | <b>Authors, publican year</b> | <b>Are there clear research questions?</b> | <b>Do the collected data allow to address the research questions?</b> | <b>Is there an adequate rationale for using a mixed methods design to address the research question?</b> | <b>Are the different components of the study effectively integrated to answer the research question?</b> | <b>Are the outputs of the integration of qualitative and quantitative components adequately interpreted?</b> | <b>Are divergences and inconsistencies between quantitative and qualitative results adequately addressed?</b> | <b>Do the different components of the study adhere to the quality criteria of each tradition of the methods involved?</b> | <b>% score</b> |
|-----------|-------------------------------|--------------------------------------------|-----------------------------------------------------------------------|----------------------------------------------------------------------------------------------------------|----------------------------------------------------------------------------------------------------------|--------------------------------------------------------------------------------------------------------------|---------------------------------------------------------------------------------------------------------------|---------------------------------------------------------------------------------------------------------------------------|----------------|
| 23        | Dixon et al (2021)            | Yes                                        | Yes                                                                   | Yes                                                                                                      | Yes                                                                                                      | Can't tell                                                                                                   | Can't tell                                                                                                    | Can't tell                                                                                                                | 57.14          |
